# Supplementary material
Source: MDPI journal article supplement (https://www.mdpi.com/2079-6412/10/3/281)
Supplement: s1 [file s1]

GAArticle

# Supplementary Materials: Insight into the Release Agents/PVD Coatings Interaction for Plastic Mold Technology

Luigi D'Avico <sup>1</sup>, Ruben Beltrami <sup>2</sup>, Eleonora Pargoletti <sup>3,4</sup>, Stefano P.M. Trasatti <sup>4,5,\*</sup> and Giuseppe Cappelletti <sup>3,4,\*</sup>

<sup>1</sup> Department of Civil, Environmental and Geomatic Engineering, Institute for Building Materials, ETH Zurich, Stefano-Franscini-Platz 3, 8093 Zürich, Switzerland; davicoluigi@ifb.baug.ethz.ch (L.D.)

<sup>2</sup> Department of Mechanical Engineering, Politecnico di Milano, Milan, Italy; ruben.beltrami@polimi.it (R.B.)

<sup>3</sup> Department of Chemistry, Università degli Studi di Milano, Via Golgi 19, 20133 Milan, Italy; eleonora.pargoletti@unimi.it (E.P.)

<sup>4</sup> Consorzio Interuniversitario per la Scienza e Tecnologia dei Materiali (INSTM), Via Giusti 9, 50121, Firenze, Italy

<sup>5</sup> Department of Environmental Science and Policy ESP, Università degli Studi di Milano, Milan, Italy

\* Correspondence: stefano.trasatti@unimi.it (S.P.M.T.), giuseppe.cappelletti@unimi.it (G.C.)

Received: 28 January 2020; Accepted: 16 March 2020; Published: date

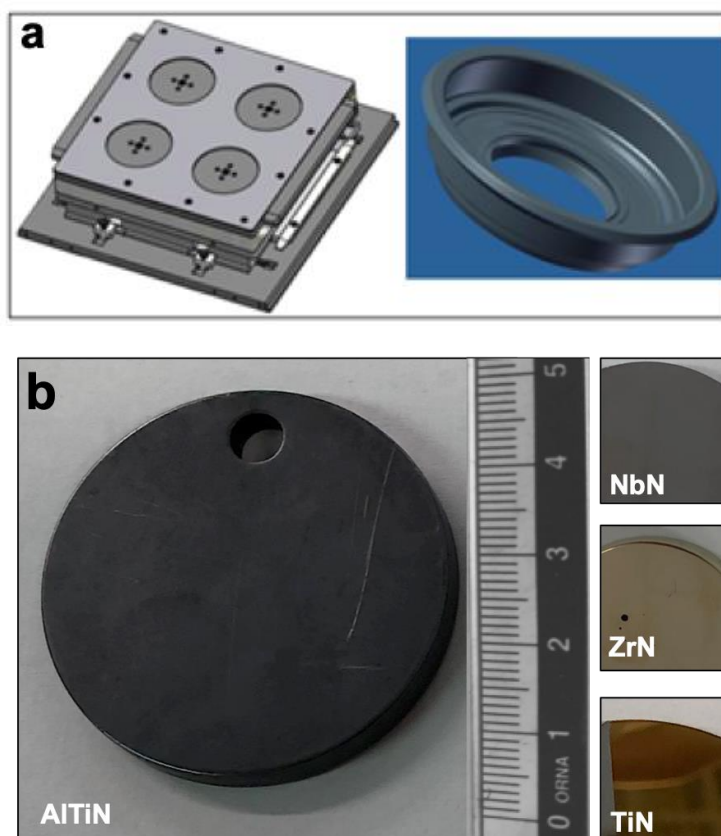

**Figure 1.** (a) Mould apparatus and moulded seal; (b) PVD coated-substrates samples.

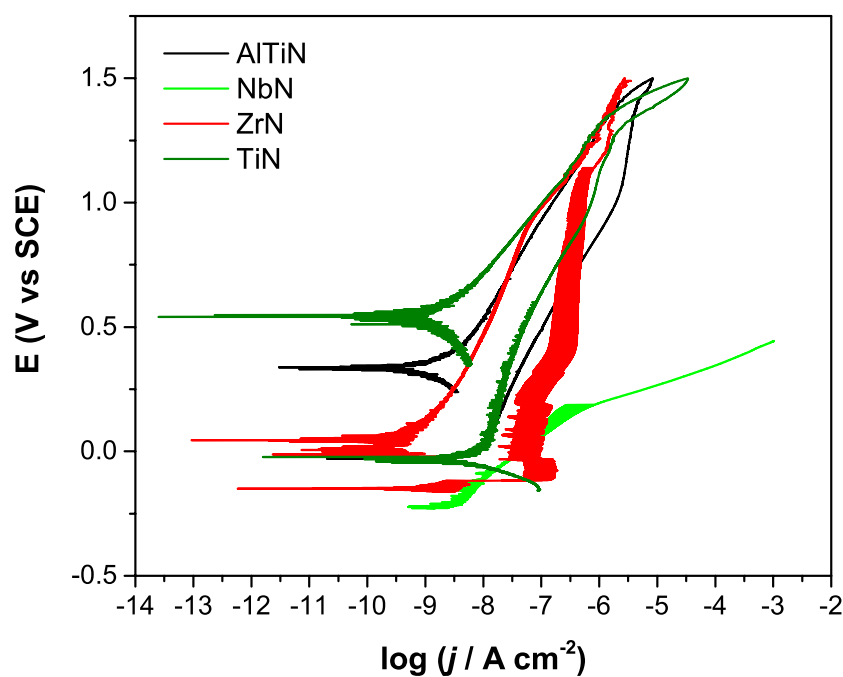

**Figure 2.** Anodic polarization curves relative to all the investigated coatings performed in 0.1 M  $\text{Na}_2\text{SO}_4$  (pH 5.5). Scan rate of  $0.17 \text{ mV s}^{-1}$ , equilibration time of 5 min and reverse current of  $2 \text{ mA/cm}^2$ .

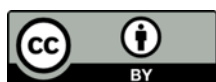

© 2020 by the authors. Submitted for possible open access publication under the terms and conditions of the Creative Commons Attribution (CC BY) license (<http://creativecommons.org/licenses/by/4.0/>).
